# Supplementary material for: HnRNP C, YB-1 and hnRNP L coordinately enhance skipping of human MUSK exon 10 to generate a Wnt-insensitive MuSK isoform
Source: PubMed Central journal article supplement — Sci Rep. 2014 Oct 30;4:6841. doi: 10.1038/srep06841 (PMC4213890; doi:10.1038/srep06841), 2014-10-30
Supplement: srep06841-s1.pdf [file srep06841-s1.pdf]

## Supplementary Information

### **HnRNP C, YB-1 and hnRNP L coordinately enhance skipping of human *MUSK* exon 10 to generate a Wnt-insensitive MuSK isoform**

Farhana Nasrin<sup>1</sup>, Mohammad Alinoor Rahman<sup>1</sup>, Akio Masuda<sup>1</sup>, Kenji Ohe<sup>1</sup>, Jun-ichi Takeda<sup>1</sup> and Kinji Ohno<sup>1</sup>

<sup>1</sup>Division of Neurogenetics, Center for Neurological Diseases and Cancer, Nagoya University Graduate School of Medicine, Nagoya, Aichi, Japan

Address correspondence to: Kinji Ohno, Division of Neurogenetics, Center for Neurological Diseases and Cancer, Nagoya University Graduate School of Medicine, 65 Tsurumai, Showa-ku, Nagoya, Aichi 466-8550, Japan

Phone: +81-52-744-2446, Fax: +81-52-744-2449, e-mail: ohnok@med.nagoya-u.ac.jp

Supplementary information includes:

Supplementary Tables 1-4

Supplementary Figures S1-S7

**Supplementary Table 1. *MUSK* transcript isoforms in human skeletal muscle tissue and cells**

|                                         | <i>MUSK</i> transcript isoform (%) |                  |                  |
|-----------------------------------------|------------------------------------|------------------|------------------|
|                                         | <b>Isoforms A and B</b>            | <b>Isoform C</b> | <b>Isoform D</b> |
| Human skeletal muscle tissue (HSKM)     | 88 ± 5.68                          | 0.07 ± 0.08      | 12 ± 5.60        |
| Human primary myoblast (SkMC)           |                                    |                  |                  |
| Undifferentiated                        | 66 ± 1.07                          | 19 ± 0.93        | 15 ± 0.28        |
| Differentiated                          | 81 ± 1.27                          | 13 ± 0.77        | 6 ± 0.51         |
| Immortalized human myogenic cells (KD3) |                                    |                  |                  |
| Undifferentiated                        | 59 ± 1.30                          | 20 ± 0.88        | 21 ± 0.74        |
| Differentiated                          | 78 ± 0.20                          | 17 ± 0.68        | 6 ± 0.59         |

Values represent mean ± standard deviation (SD) of three independent experiments.

Transcript isoforms are shown in Fig. S2(c) according to the annotation of ENSEMBL 76.

**Supplementary Table 2. Primer sequences for making constructs**

| <b>Primers</b>                                          | <b>5' – 3' sequences</b>                                         |
|---------------------------------------------------------|------------------------------------------------------------------|
| <i>pcDNA-human-MUSK</i>                                 |                                                                  |
| hMusk-ex8/F                                             | CACCATGGTTTCTTCTGGGTCC                                           |
| hMusk-ex11/R                                            | CTAGATGTGGCAGTCTGGCACAG                                          |
| hMusk-int8/F                                            | TCCTAGCAGAAGCGGAGAACT                                            |
| hMusk-int8/R                                            | TCCGCTTCTGCTAGGAGGAAGGAGGGAGGAATGA                               |
| hMusk-int9/F                                            | CCCAAAGCTTTCACATCTATC                                            |
| hMusk-int9/R                                            | TGGAAAAGCTTTGGGAAAACATACTCCACCGCACT                              |
| hMusk-int10/F                                           | CAGAATTTAGGCTCTGCCAC                                             |
| hMusk-int10/R                                           | GCAGAGCCTAAATTTGCCTCAAGTGATCCACCCACT                             |
| <i>pSPL3-human-MUSK</i>                                 |                                                                  |
| X10NotF                                                 | AGTTAGCGGCCGCTTCCCAAAGCTTTCACATC                                 |
| X10PacR                                                 | ATGTATTAATTAACCTCAAGTGATCCACCCACT                                |
| <i>pSPL3-mouse-Musk</i>                                 |                                                                  |
| musX10NotF                                              | AGTTAGCGGCCGCGGTGCAAGAGCTATGTAAGCTGACTG                          |
| musX10PacR                                              | ATGTATTAATTAACCTTCTGACTGAGCCAGACTCTAA                            |
| <i>Deletion constructs of pSPL3-human-MUSK</i>          |                                                                  |
| ui-200F                                                 | AGTTAGCGGCCGCGCCCTGTGGAGTAGC                                     |
| ui-150F                                                 | AGTTAGCGGCCGCAATATTCAAATGGAGCGTGTG                               |
| ui-100F                                                 | AGTTAGCGGCCGCTTCTGAGACACAGATGTG                                  |
| X10-150R                                                | ATGTATTAATTAAGAGCCACTGCACCCAGGCA                                 |
| X10-92R                                                 | ATGTATTAATTAACCTGTTGCATATTAC                                     |
| X10-60R                                                 | ATGTATTAATTAACCTTCTGTTGTGCAG                                     |
| <i>Chimeric minigene constructs of pSPL3-human-MUSK</i> |                                                                  |
| UichF                                                   | GAATTCTGGAGCTCGAGCGGCCGCGACAGTCTCTA                              |
| UichR                                                   | GTAGCCTTTGTATCTTCTGTGGTTTACTGAAAGAAGTG                           |
| Ech-F                                                   | GTGTTCATTTCTTCTTTCAGTAAGTCACAGAAAAG                              |
| Ech-R                                                   | CTTTGACTTATTTTTGAGATTTTACCTGCAAATGG                              |
| Dich/F                                                  | CTACTCCTATTCCCATTTCAGAGTAAAACTTTG                                |
| Dich/R                                                  | CAGGTACGGGATCATTAAATTAACAAACTCTTGGC                              |
| 181/F (second half chimera)                             | CTGAGGAGGCCAAAGAGCTACTGATCCACACTGCGTGGAAATGAGC                   |
| 180/R (first half chimera)                              | TTCATTCAGGCCGTGTGGACCAGGCAGCTCCTGGGCGTCTC                        |
| <i>Block-scanning mutagenesis of pSPL3-human-MUSK</i>   |                                                                  |
| MBS1F                                                   | GAAATGTTGTTTCATTTCTTTTCAGTAATCAGTATGACTCTCAGTATGGCTACTGCGCCAG    |
| MBS1R                                                   | CTGGGCGCAGTAGCCATACTGAGAGTCATACTGATTACTGAAAGAAGAAATGAACAACATTTTC |
| MBS2F                                                   | CAGAAAAGATAACAATCAGTATGACTCTCAGTATGGAGGGGAGGTG                   |
| MBS2R                                                   | CACCTCCCCTCCATACTGAGAGTCATACTGATTGTTATCTTTCTG                    |
| MBS6F                                                   | CTCAACACCTCCTTCAGTATGACTCTCAGTATGCAAGAGCTACTG                    |
| MBS6R                                                   | CAGTAGCTCTTGATACTGAGAGTCATACTGAAGGAGGTGTTGAG                     |
| MBS8F                                                   | ACTGGTCCACACTCAGTATGACTCTCAGTATGTAAGTGGCCAGT                     |
| MBS8R                                                   | ACTGGGCTCACTACATACTGAGAGTCATACTGAGTGTGGACCAGT                    |
| MBS3F                                                   | CTGCGCCCAGTACATCAGTATGACTCTCAGTATGGTCTGGCAAAAG                   |
| MBS3R                                                   | CTTTTGCCAGGACCATACTGAGAGTCATACTGATGTAAGTGGGCGCAG                 |
| MBS4F                                                   | AGGTGTGTAATGCATCAGTATGACTCTCAGTATGTGTTTTCTCAACAC                 |
| MBS4R                                                   | GTGTTGAGAAAAACATACTGAGAGTCATACTGATGCATTACACACCT                  |
| MBS5F                                                   | GCAAAAAGATGCTTTCAGTATGACTCTCAGTATGATGCGGACCCTGAG                 |
| MBS5R                                                   | CTCAGGGTCCGCATCATACTGAGAGTCATACTGAAGAGCATCTTTTGC                 |
| MBS7F                                                   | GACCCTGAGGAGGCCCTCAGTATGACTCTCAGTATGGGCTGGAATGAAC                |
| MBS7R                                                   | GTTTATTCCAGGCCATACTGAGAGTCATACTGAGGCCCTCCTCAGGGTC                |
| MBS9F                                                   | GGAATGAACTGAAAGTCAGTATGACTCTCAGTATGCCAGCTGTGAG                   |
| MBS9R                                                   | CTCAGCAGCTGGCATACTGAGAGTCATACTGACTTTCAGTTTATTCC                  |
| MBS10F                                                  | GAGCCCAGTCTGCCGGTTCAGTATGACTCTCAGTATGGTGTAAACCACATC              |
| MBS10R                                                  | GATGTGGTTACACCATACTGAGAGTCATACTGACCGGCAGACTGGGCTC                |
| MBS11F                                                  | GCTGAGGCTTTGTTTCAGTATGACTCTCAGTATGAGTGCAGTCTCTGGA                |
| MBS11R                                                  | TCCAGGACTGCACATACTGAGAGTCATACTGAAACAAAAGCCTCAGC                  |
| MBS12F                                                  | ACCACATCTTCCAGGTCAGTATGACTCTCAGTATGCCTACTCCTATTTC                |
| MBS12R                                                  | GAATAGGAGTAGGCATACTGAGAGTCATACTGACCTGGAAGATGTGGT                 |
| MBS13F                                                  | GTCTGGAGTAGTGTGTCAGTATGACTCTCAGTATGCAGGTAATAATCTC                |
| MBS13R                                                  | GAGATTTTACTGCATACTGAGAGTCATACTGACACTACTCCAGGAC                   |

## Supplementary Table 2. Continued

| Primers                                      | 5' – 3' sequences                                  |
|----------------------------------------------|----------------------------------------------------|
| <i>pH-mB5 minigene</i>                       |                                                    |
| SDM/5F                                       | CTGGCAAAAGATGCTCTTGTCTTCTTCAACACCTCCTATGCGGAC      |
| SDM/5R                                       | GTCCGCATAGGAGGTGTTGAAGAAGACAAGAGCATCTTTTGCCAG      |
| <i>pH-mB12 minigene</i>                      |                                                    |
| SDM/BS12F                                    | CTTCCAGGAGTGCAGCCCTGGAGTGGTGCCTACTCCTATTCC         |
| SDM/BS12R                                    | GGAATAGGAGTAGGCACCACTCCAGGGCTGCACTCCTGGAAG         |
| <i>pSPL3-human-MUSK-MS2-PP7</i>              |                                                    |
| MG-MS2/F                                     | CAAAAGATGCTCTTGACATGAGGATCACCCATGTCAACACCTCCTATGC  |
| MG-MS2/R                                     | GCATAGGAGGTGTTGACATGGGTGATCCTCATGTCAAGAGCATCTTTTG  |
| MG/pp7/F                                     | GATCACCCATGTGGCACGAAGATATGGCTTCGTGCCCTATGCGGACCCTG |
| MG/pp7/R                                     | CAGGGTCCGCATAGGGCACGAAGCCATATCTTCGTGCCACATGGGTGATC |
| <i>MS2- or PP7-fused effector constructs</i> |                                                    |
| pc/F                                         | CACCATGGCCAGCAACGTTAC                              |
| pc/R                                         | AGAGTCATCCTCGCCATTG                                |
| pp7-insYB1-F                                 | GCTGAGGCGCCCGCATGTCCAAAACCATCGTTCTTTTCGGTCCG       |
| pp7-insYB1-R                                 | TGGATCTGCGGCCGCACGGCCAGCGGCACAAG                   |
| Xho1-pp7/F                                   | AGTTACTCGAGTATGTCCAAAACCATCGTTCTTTTCGGTCCG         |
| Xba1-pp7/R                                   | ATGTATCTAGACTACGGCCAGCGGCACAAGGTTG                 |
| pc-pp7/F                                     | CACCATGTCCAAAACCATCGTTC                            |
| pc-pp7/R                                     | ACGGCCAGCGGCAC                                     |

**Supplementary Table 3: Primer sequences for RT-PCR**

| <b>Primers</b>                                                         | <b>5' – 3' sequences</b>    |
|------------------------------------------------------------------------|-----------------------------|
| <i>Splicing of endogenous human MUSK</i>                               |                             |
| hMuSK-ex8/F                                                            | GCTGCAGCCACCATCAGCAT        |
| hMuSK-ex11/R                                                           | TGCTGCATTCTGGCACGGACA       |
| <i>Splicing of endogenous mouse Musk</i>                               |                             |
| mMuSKex8/F                                                             | AAGTTCAGTACCGCAAAGGC        |
| mMuSKex11/R                                                            | AGAAGAGCTCCTTTACCGCC        |
| <i>Splicing of pcDNA-human-MUSK</i>                                    |                             |
| pcDNA-F                                                                | TCCAGTACCCTTACCATG          |
| BGH-R                                                                  | TAGAAGGCACAGTCGAGG          |
| <i>Splicing analysis of pSPL3 human/mouse minigenes</i>                |                             |
| pSPL3-F                                                                | TCTGAGTCACCTGGACAACC        |
| pSPL3-R                                                                | ATCTCAGTGGTATTTGTGAGC       |
| <i>Expression of endogenous human MUSK variants (Real-time RT-PCR)</i> |                             |
| H-MuSK-8/F                                                             | GCTGCAGCCACCATCAGCAT        |
| H-MuSK-10R                                                             | GCACTCCTGGAAGATGTGGT        |
| H-MuSK-8-11/F                                                          | ACCATCAGCATAGCAGAG          |
| H-MuSK-8-9-11/F                                                        | AGCATAGCAGAATGGAGAG         |
| H-MuSK-11/R                                                            | TGCTGCATTCTGGCACGGACA       |
| <i>Endogenous human protein expression</i>                             |                             |
| RT-hnRNP C/F                                                           | ATGTGGAGGCAATCTTTTCG        |
| RT-hnRNP C/R                                                           | TTTCTCGGTTCACTTTTGG         |
| RT-hnRNP L/F                                                           | TTCTGCTTATATGGCAATGTGG      |
| RT-hnRNP L/R                                                           | GACTGACCAGGCATGATGG         |
| RT-YB1/F                                                               | GTCATCGCAACGAAGGTTTT        |
| RT-YB1/R                                                               | AACTGGAACACCACCAGGAC        |
| GAPDH-human-F                                                          | ATGGCACCCTCAAGGCTGAGA       |
| GAPDH-human-R                                                          | GGCATGGACTGTGGTCATGAG       |
| MYOG-human1-F                                                          | GGTGCCAGCGAATGC             |
| MYOG-human1-R                                                          | TGATGCTGTCCACGATGGA         |
| <i>Endogenous mouse protein expression</i>                             |                             |
| GAPDH-mouse-F                                                          | ACCACAGTCCATGCCATCAC        |
| GAPDH-mouse-R                                                          | TCCACCACCCTGTTGCTGTA        |
| Myogenin-mouse-F                                                       | TCCAGTACATTGAGCGCCTAC       |
| Myogenin-mouse-R                                                       | ACATATCCTCCACCGTGATGC       |
| <i>Additional target genes regulated by hnRNP C or/and YB-1</i>        |                             |
| srsf11/F                                                               | CAGACTCAGCAGTTGTGGCAC       |
| srsf11/R                                                               | CAAGCCCCAAAATGAGAGTTC       |
| faim/F                                                                 | TTGGTACTCGCGCTGCAGAG        |
| faim/R                                                                 | CTCGTTTGCCTGATGTAGTCCC      |
| SUB1/F                                                                 | CAAGTTGCTCCAGAAAAACC        |
| SUB1/R                                                                 | CAGGATCCATCCAATATTCTC       |
| CKLF/F                                                                 | ACGCGATGGATAACGTGCAG        |
| CKLF/R                                                                 | GATTGAACAGAAGCTTCCGGT       |
| RBM14/F                                                                | GGCTGCGGCGCAAAAATGAAGATATTC |
| RBM14/R                                                                | ACGAAAGCTGCGACTCTGAT        |
| cdc73/F                                                                | CGTGCACTTTCTCATCCTG         |
| cdc73/R                                                                | GAGTAGATCGCTGAAGACCT        |
| lrrc42/F                                                               | CTTCACTGTGTCCCACCCTTC       |
| lrrc42/R                                                               | CAAAGCTCCACAGAAAAGCC        |
| IL7R/F                                                                 | CTGAGGCTCCTTTTGACCTG        |
| IL7R/R                                                                 | GGAGACTGGGCCATACGATA        |
| NBPF3/F                                                                | CTGTTTAGACCCAGGCGAAG        |
| NBPF3/R                                                                | TGACGTTGTGGCAGAAGAG         |

**Supplementary Table 4. Overlap extension PCR primers to synthesize RNA probes**

| <b>Primers</b> | <b>5' – 3' sequences</b>      |
|----------------|-------------------------------|
| T7-F           | TAATACGACTCACTATAGGG          |
| H-B5-R         | AGGAGGTGTTGAGAAAAACACCCTATAG  |
| m-B5-R         | AGGAGGTGTTGAAGAAGACACCCTATAG  |
| H-B5D5-R       | GGAGGTGTTGAACAACCCTATAG       |
| H-B12-R        | ACTACTCCAGGACTGCACTCCCCTATAG  |
| m-B12-R        | ACCCTCCAGGGCTGCACTCCCCTATAG   |
| H-B12D12-R     | ACTCCAGTGCCTCCCCTATAG         |
| H-mut1-R       | GGAGGTGTTGAGAAAAAGAACCCTATAG  |
| H-mut2-R       | GGAGGTGTTGAGAAAAGCAACCCTATAG  |
| H-mut3-R       | GGAGGTGTTGAGAAAAGACAACCCTATAG |
| H-mut4-R       | GGAGGTGTTGAGAAGAACAACCCTATAG  |
| H-mut5-R       | GGAGGTGTTGAGAGAAAACAACCCTATAG |
| H-mut6-R       | GGAGGTGTTGAGGAAAACAACCCTATAG  |
| H-mut7-R       | GGAGGTGTTGACAAAAACAACCCTATAG  |
| H-mut8-R       | GGAGGTGTTGCGAAAAACAACCCTATAG  |
| H-mut9-R       | GGAGGTGTTGAGAAAAACAACCCTATAG  |
| H-mut10-R      | GGAGGTGTAGAAAAACAACCCTATAG    |
| H-mut11-R      | GGAGGTGATGAGAAAAACAACCCTATAG  |
| H-mut12-R      | GGAGGTCTTGAGAAAAACAACCCTATAG  |
| H-mut13-R      | GGAGGCGTTGAGAAAAACAACCCTATAG  |
| H-mut14-R      | GGAGCTGTTGAGAAAAACAACCCTATAG  |
| H-mut15-R      | GGACGTGTTGAGAAAAACAACCCTATAG  |
| H-mut16-R      | GGCGGTGTTGAGAAAAACAACCCTATAG  |

## FIGURE LEGENDS

### **Figure S1. Sequence alignment of MuSK Fz-CRD, as well as FZD1 across different species.**

Conserved cysteine residues are shown by red letters and boxed by blue lines. In human, *MUSK* exon 10 encoding 6 cysteines and exon 11 encoding 4 cysteines constitute Fz-CRD.

### **Figure S2. Genomic structure of human *MUSK* and splicing isoforms.**

(a) Genomic and CDS structures of human *MUSK*. Green and red boxes show constitutive and alternative exons, respectively. Black boxes indicate UTRs. (b) Partial genomic sequence of human *MUSK* gene spanning exon 8 to exon 11. Genomic coordinates of each exon according to GRCh37/hg19 are shown in blue. Green and red uppercase nucleotides indicate constitutive and alternative exons, respectively. Introns are shown by black lowercase letters. (c) Schematics of human *MUSK* transcripts annotated in ENSEMBL 76. Black and blue connecting lines indicate constitutive and alternative splicing, respectively. Constitutively and alternatively spliced exons are indicated in green and red, respectively. Shaded exons represent 5' and 3' UTRs. (d) RT-PCR of endogenous *MUSK* transcripts spanning exons 8 to 11 using total RNA isolated from human skeletal muscle (HSKM), undifferentiated immortalized human myogenic cells (KD3), and undifferentiated primary human myoblasts (SkMC). Closed arrowhead points to an exon 10-included product, which is comprised of isoforms A and B in panel (c). Open arrowhead points to exon 10-skipped products, which are comprised of overlapping fragments of isoforms C and D in panel (c). Inclusion and skipping of the 7-nt exon 9 could not be differentiated on a gel. (e) RT-PCR of endogenous *Musk* transcripts spanning exons 8 to 11 of total RNA isolated from the indicated mouse skeletal muscles and the differentiated C2C12 mouse myotubes. Note that exon 10-skipped product is not detected in any of the mouse samples. (f) Alternative human *MUSK* transcripts harboring different combinations of exons 9 and 10 that we identified by cloning and sequencing the RT-PCR products in (d). The ENSEMBL transcripts for isoforms A-D are shown in (c).

### **Figure S3. Additional information for Figs. 2, 3, and 4.**

(a) Schematic of pSPL3-human-*MUSK* constructs with sequential deletions of upstream or downstream introns to identify minimal sequences to drive skipping of exon 10. RT-PCR of the respective minigenes in

HeLa cells are shown at the bottom. (b) ESS12 RNA probes carrying human (H-B12), mouse (m-B12), and partially deleted (H-B12 $\Delta$ 6) sequences. (c)  $^{32}$ P-labeled H-B12 and m-B12 RNA probes are incubated with or without HeLa nuclear extract and resolved on a native polyacrylamide gel. (d) Coomassie blue staining of RNA affinity-purified products of HeLa nuclear extract using the indicated biotinylated RNA probes. (e) RT-PCR of pSPL3-human-*MUSK* (pH-wt) minigene in HeLa cells treated with the second set of siRNAs. mRNA targets of the second set of siRNAs are different from those of the first set shown in Fig. 4b.

**Figure S4. Additional information for Fig. 5.** (a) Immunoblotting of mock-, hnRNP C-, and non-depleted HeLa nuclear extracts showing efficient removal of hnRNP C. (b) Mock-depleted ( $\Delta$ Mock) and hnRNP C-depleted ( $\Delta$ hnRNP C) HeLa nuclear extracts are affinity-purified with the indicated RNA probes and resolved by immunoblotting (IB). NuEx, native HeLa nuclear extract used as an input. (c) Tethering of only MS2 and PP7 to pSPL3-human-*MUSK*-MS2-PP7 has no effect on splicing regulation of *MUSK* exon 10. (d) Schematic of pSPL3-human-*MUSK*-non-MS2-PP7 that lacks MS2- and PP7-binding sites, as well as ESS5. RT-PCR of pSPL3-human-*MUSK*-non-MS2-PP7 in HeLa cells co-transfected with the indicated effectors. (e) Expressions of cDNA constructs in HeLa cells are detected by immunoblotting (IB). Expressions of cDNAs for YB-1 and hnRNPs L in HeLa cells are also shown in Fig. 4c. Native and recombinant proteins are indicated by ‘endo’ and ‘exo’, respectively.

**Figure S5. Molecular interactions among the splicing repressors of *MUSK*.** HeLa nuclear extract is immunoprecipitated with the indicated IP-antibody in the presence or absence of RNase, and the precipitated products are immunoblotted with the indicated IB-antibody. Ten-times diluted native HeLa nuclear extract are indicated by ‘Input (10%)’.

**Figure S6. Effects of hnRNP C and YB-1 on splicing of alternative exons other than *MUSK* exon 10.** RT-PCR of alternatively spliced exons that are coordinately regulated by both hnRNP C and YB-1 (a), hnRNP C (b), and YB-1 (c) in HeLa cells. Closed and open arrowheads point to exon-included and exon-skipped transcripts, respectively.



**Figure S7. Additional information for Fig. 6.** (a) Phase-contrast images showing a temporal profile of differentiation of primary human myoblasts (SkMC). (b) RT-PCR showing alternative skipping of endogenous *MUSK* exon 10 (Isoforms C and D as shown in Fig. S2c) at different differentiation days of SkMC. (c) RT-PCR of endogenous *Musk* transcripts spanning exons 8 to 11 at different differentiation days of mouse myoblast cells (C2C12).

### MuSK Fz-CRD

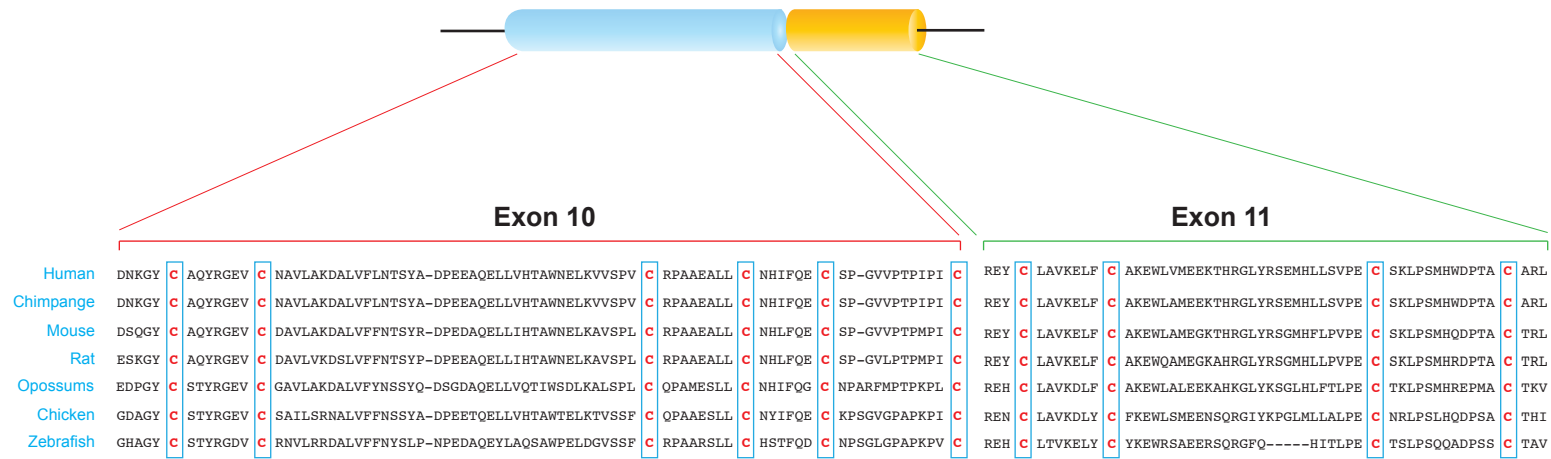

### FZD1

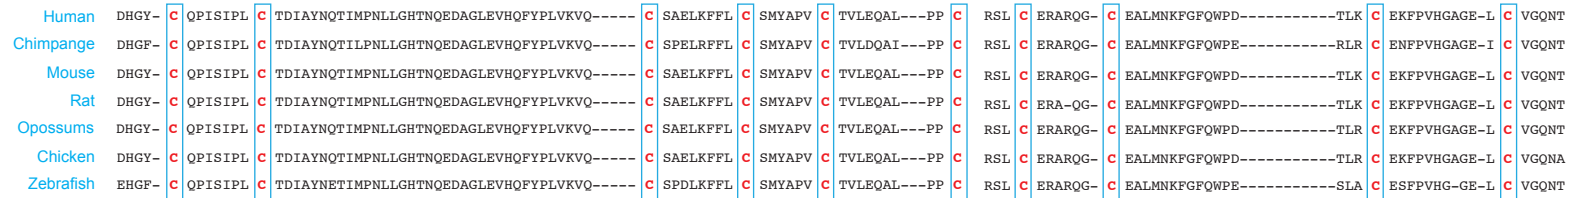

Supplementary Figure S1

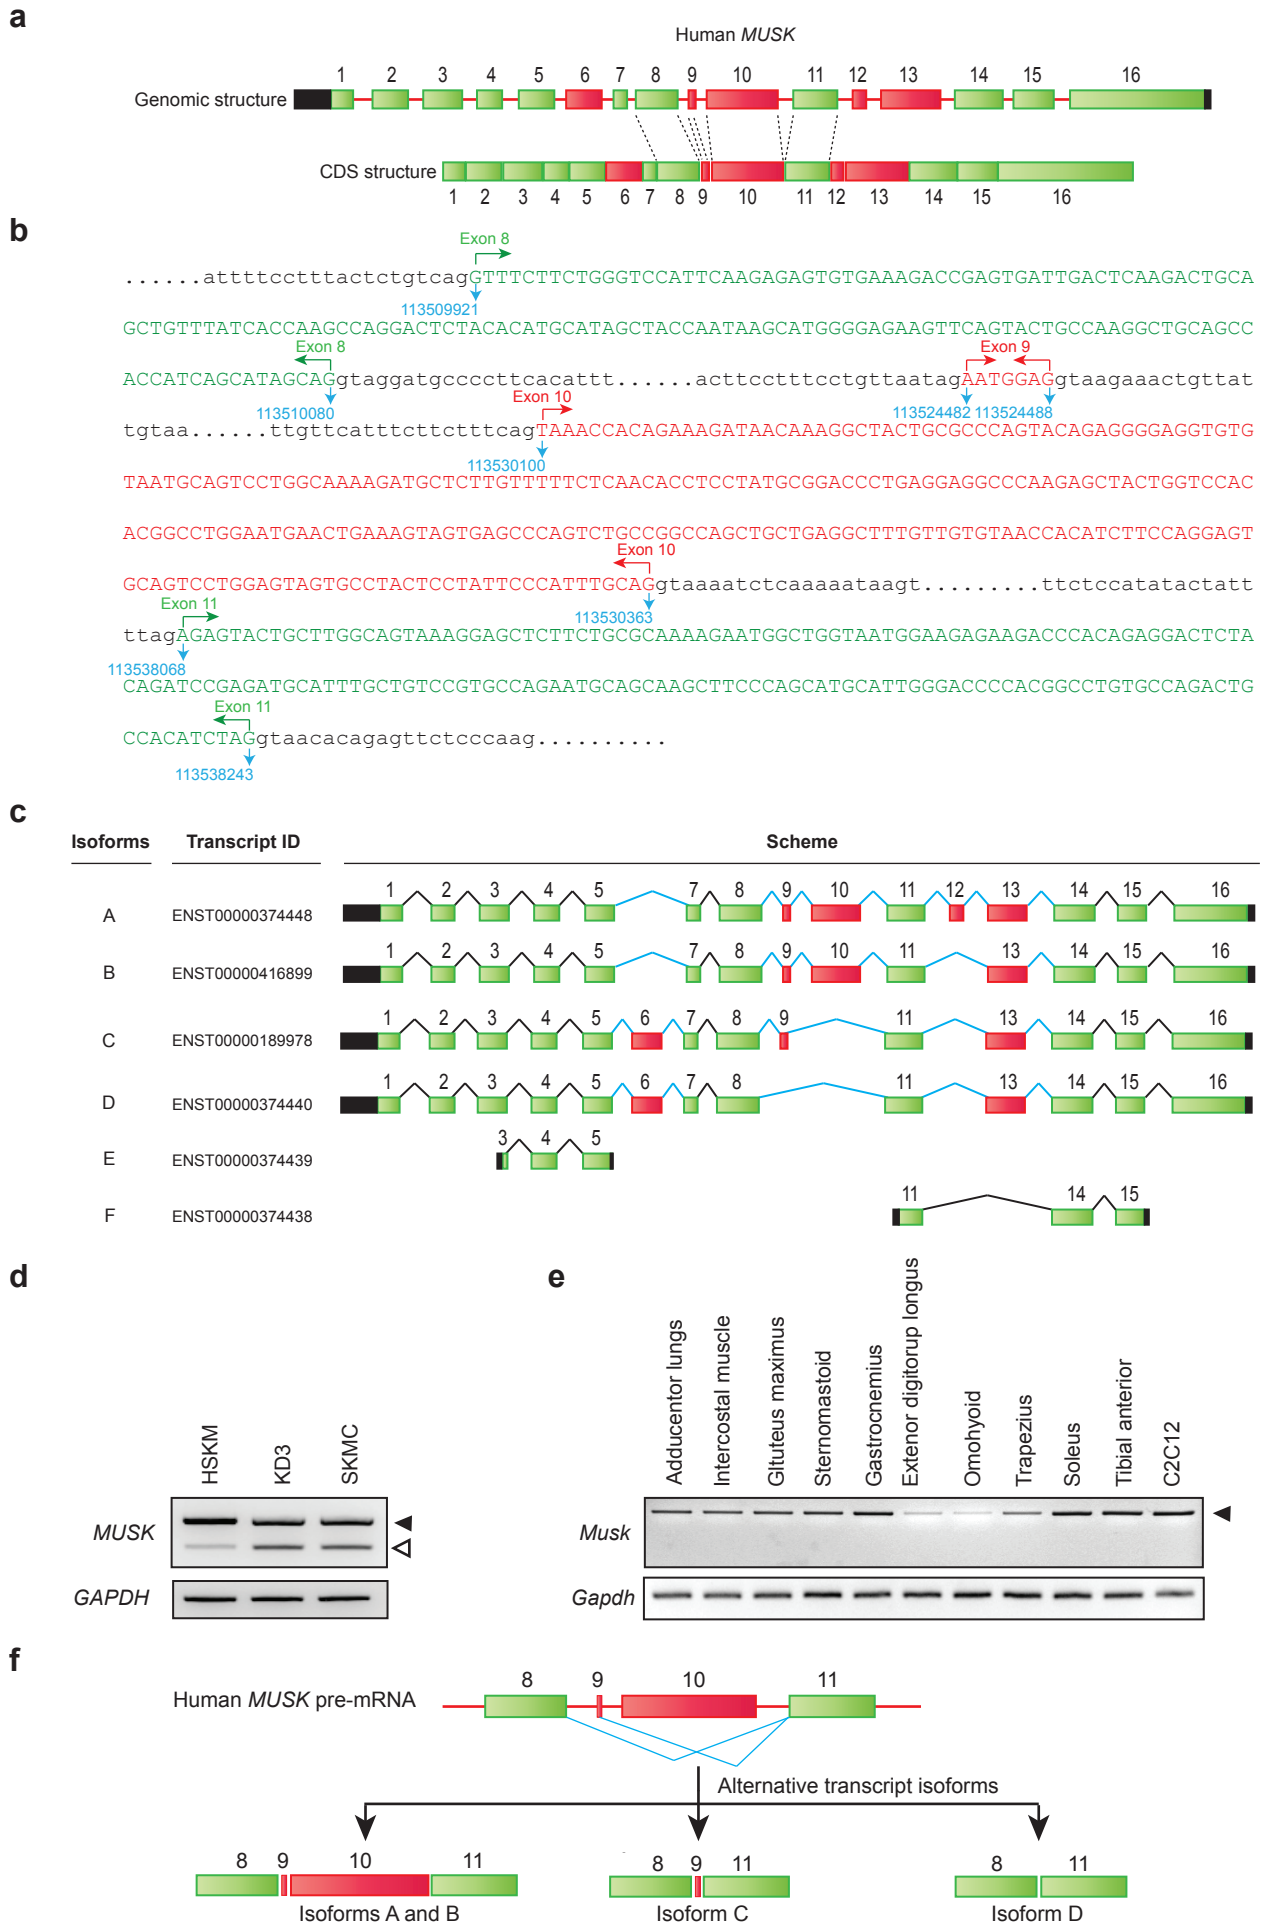

**Supplementary Figure S2**

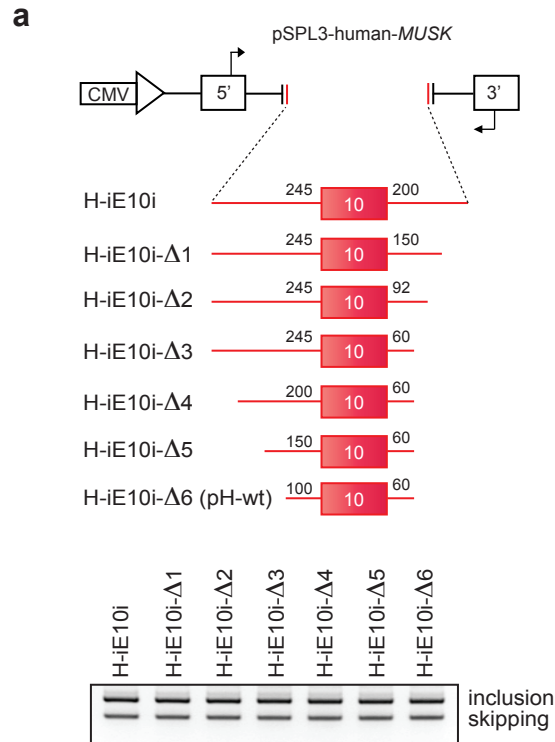

**b**

Human (H-B12) GAGTGCAGTCCTGGAGTAGT  
 mouse (m-B12) GAGTGCAGCCCTGGAGTGGT  
 Human (H-B12Δ6) GAGTGCA---CTGGAG---T

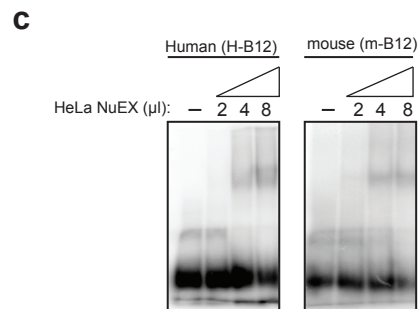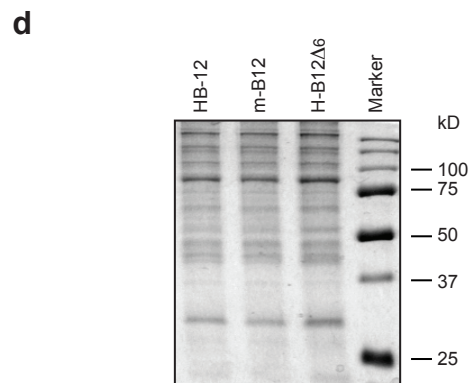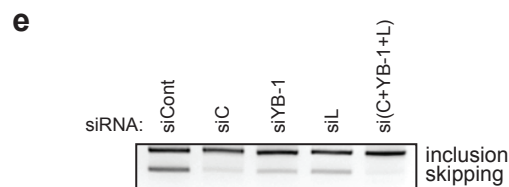

Supplementary Figure S3

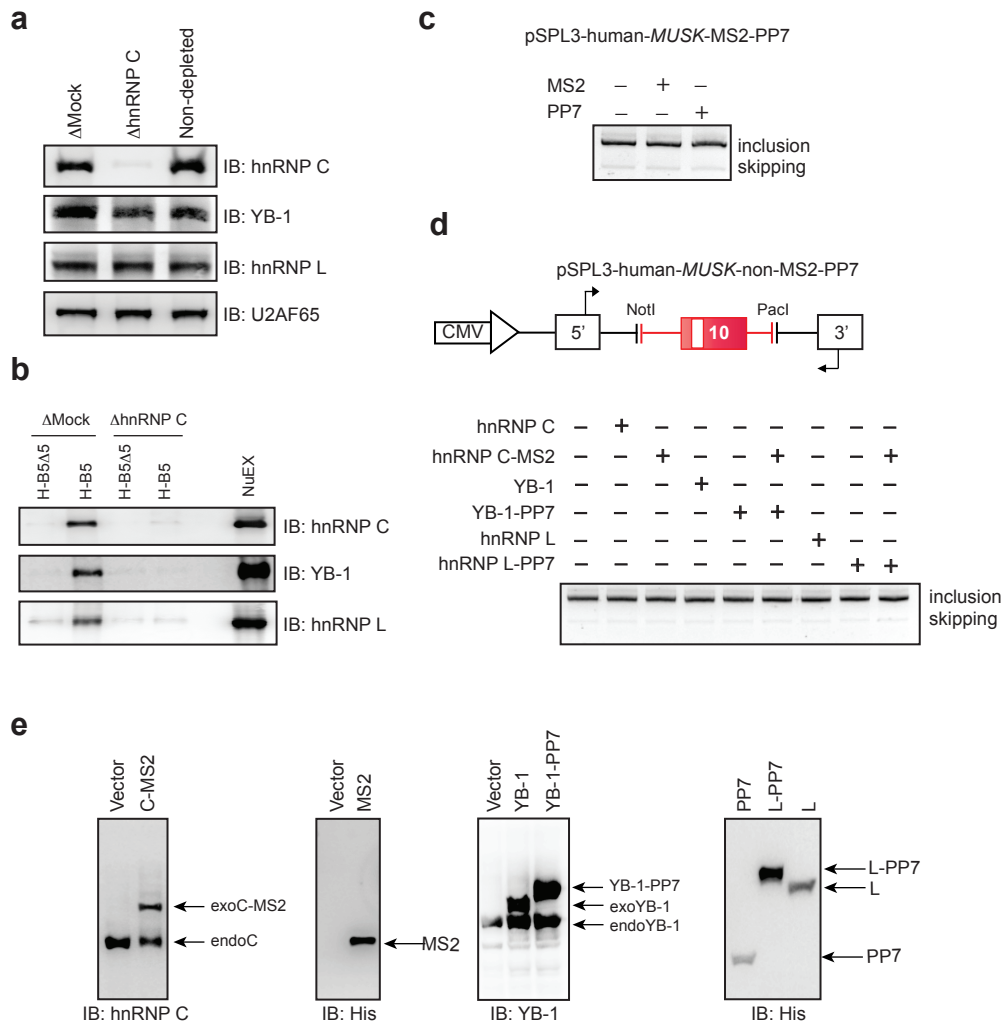

Supplementary Figure S4

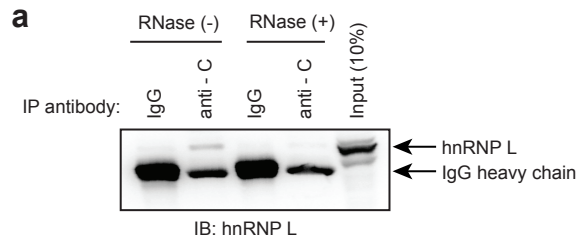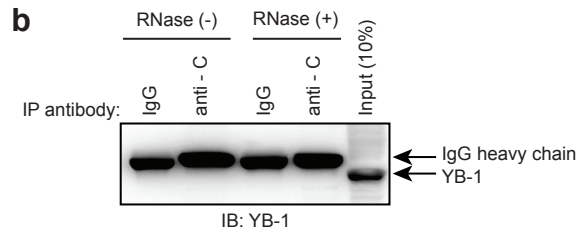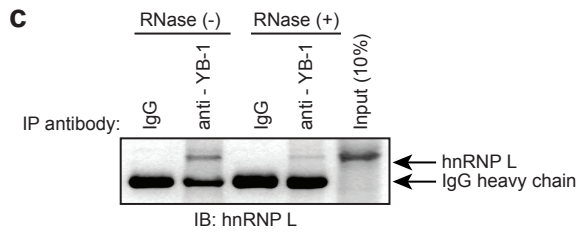

**Supplementary Figure S5**

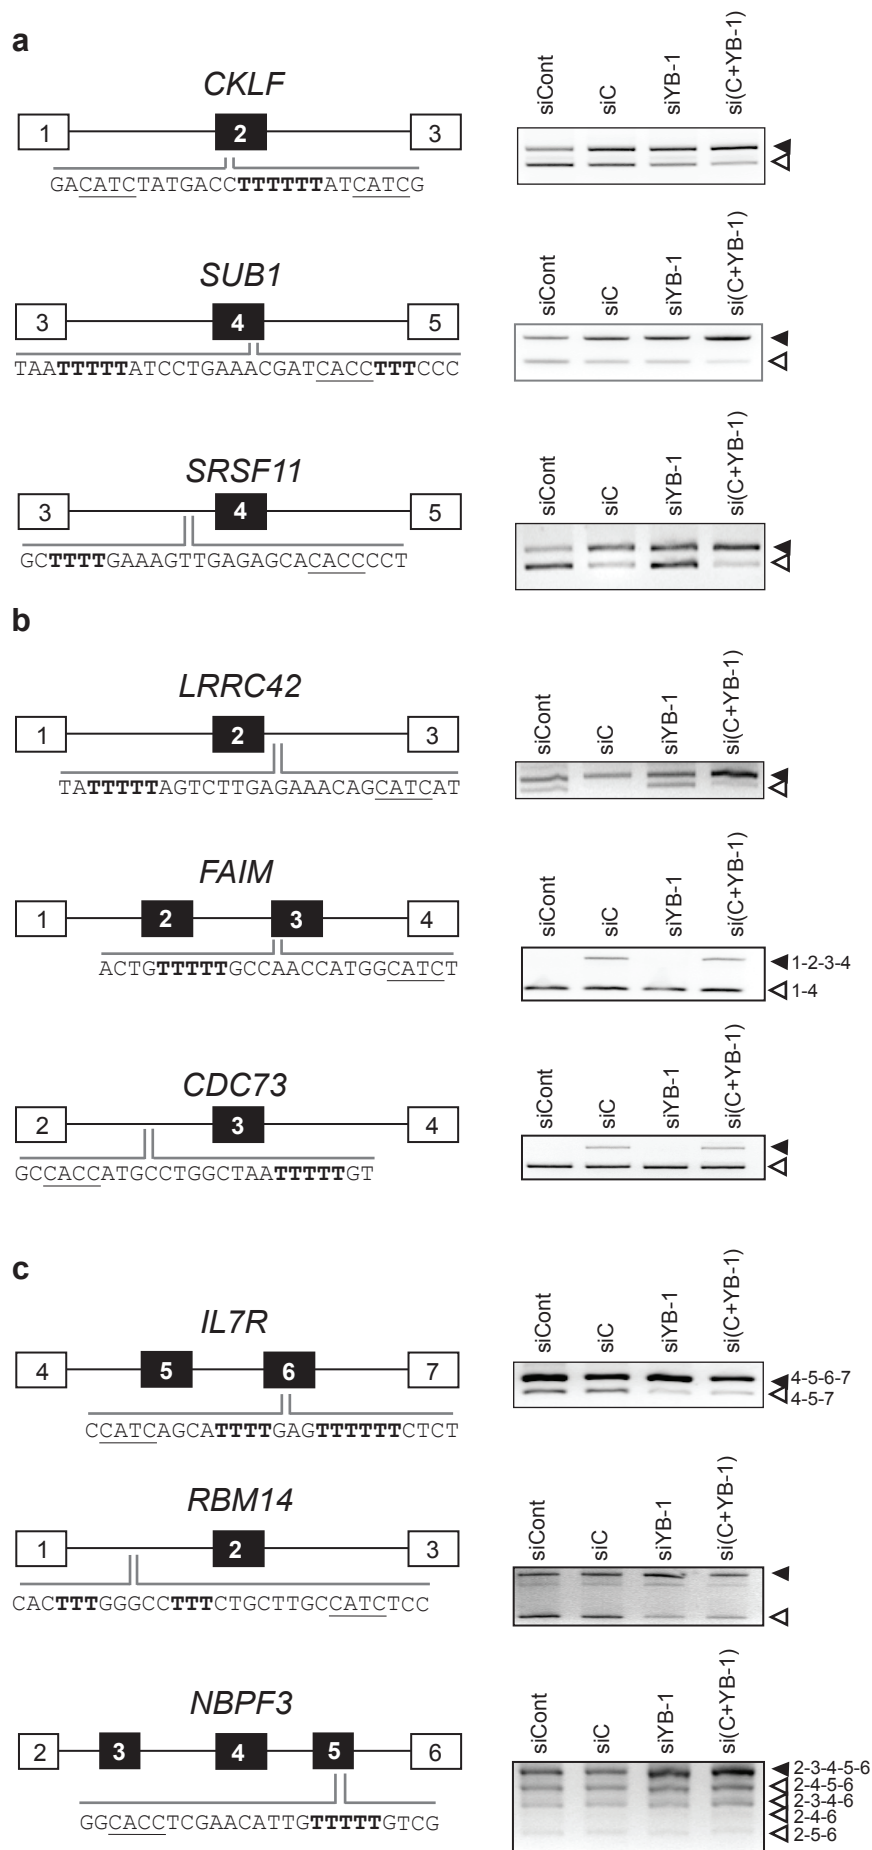

Supplementary Figure S6

**a**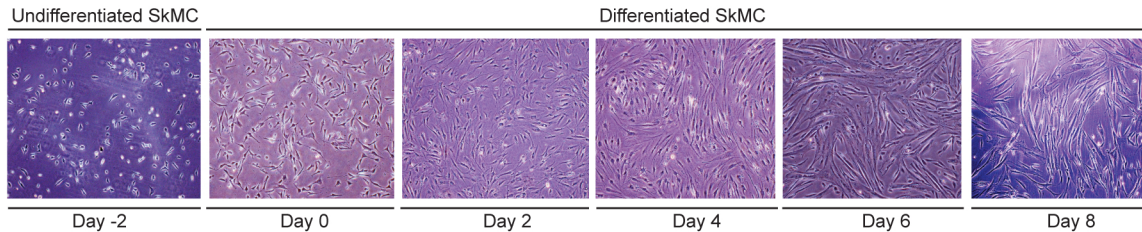**b**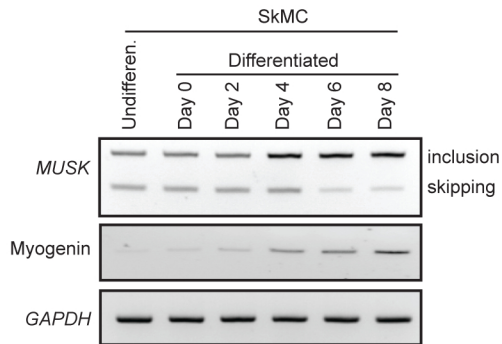**c**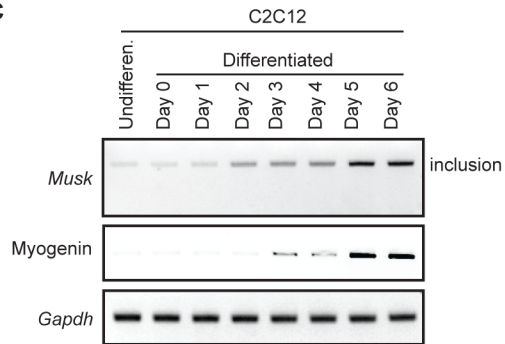

**Supplementary Figure S7**
